# Supplementary material for: Phylogenetic relationships of subfamilies in the family Hesperiidae (Lepidoptera: Hesperioidea) from China
Source: PubMed Central journal article supplement (PMC4461911; doi:10.1038/srep11140), 2015-06-10
Supplement: srep11140-s1.pdf [file srep11140-s1.pdf]

# Phylogenetic relationships of subfamilies in the family Hesperidae (Lepidoptera: Hesperioidea) from China

Yuan Xiangqun, Gao Ke, Yuan Feng, Wang Ping, Zhang Yalin

**Appendix 1.** List of Hesperidae and outgroups used in this study, with collection localities and GenBank accession numbers

| Subfamily   | Species                             | Locality               | GenBank accession no. |            |            |
|-------------|-------------------------------------|------------------------|-----------------------|------------|------------|
|             |                                     |                        | <i>Cytb</i>           | <i>NDI</i> | <i>COI</i> |
| Coeliadinae | <i>Burara miracula</i>              | Fujian, Wuyi Mountain  | KM895429              | KM895451   | KM895473   |
|             | <i>Choaspes benjaminii</i>          | Jiangxi, Ruijin        | KM895435              | EU783937   | KM895476   |
|             | <i>Choaspes hemixantha</i>          | Jiangxi, Suichuan      | KM895436              | KM895457   | KM895477   |
| Eudaminae   | <i>Lobocla bifasciata</i>           | Yunnan, Zhongdian      | KM895441              | KM895462   | GU372595   |
|             | <i>Lobocla liliana</i>              | Yunnan, Zhongdian      | KM895442              | KM895463   | —          |
| Pyrginae    | <i>Capila translucida</i>           | Sichuan, Emei Mountain | KM895430              | KM895452   | KM895474   |
|             | <i>Celaenorrhinus consanguineus</i> | Yunnan, Zhongdian      | KM895434              | KM895456   | KM895475   |
|             | <i>Abraximorpha davidii</i>         | Hainan, Changjiang     | KM895427              | KM895449   | KM895471   |

|                |                                     |                          |          |          |          |
|----------------|-------------------------------------|--------------------------|----------|----------|----------|
|                | <i>Daimio tethys</i>                | Shaanxi, Tongchuan       | KM895438 | KM895459 | KM895479 |
|                | <i>Coladenia hoenei</i>             | Shaanxi, Feng County     | KM895437 | KM895458 | KM895478 |
|                | <i>Satarupa nymphalis</i>           | Gansu, Hui County        | KM895446 | —        | GU372591 |
|                | <i>Sarangesa dasahara</i>           | Yunnan, Jinghong         | —        | KM895468 | HQ962347 |
| Heteropterinae | <i>Heteropterus morpheus</i>        | Jilin, Changbai Mountain | KM895440 | KM895461 | JX445978 |
|                | <i>Carterocephalus argyrostigma</i> | Gansu, Xishu             | KM895431 | KM895453 | —        |
|                | <i>Carterocephalus dieckmanni</i>   | Yunnan, Zhongdian        | KM895432 | KM895454 | —        |
|                | <i>Cartericephalus urasimataro</i>  | Shaanxi, Taibai County   | KM895433 | KM895455 | —        |
| Hesperiinae    | <i>Halpe concavimarginata</i>       | Fujian, Wuyi Mountain    | KM895439 | KM895460 | KM895480 |
|                | <i>Pithauria stramineipennis</i>    | Yunnan, Menglun          | KM895445 | KM895467 | KM895485 |
|                | <i>Aeromachus piceus</i>            | Fujian, Wuyi Mountain    | KM895428 | KM895450 | KM895472 |
|                | <i>Matapa aria</i>                  | Fujian, Wuyi Mountain    | KM895443 | KM895464 | KM895481 |
|                | <i>Suastus gremius</i>              | Fujian, Fuzhou           | KM895447 | KM895469 | —        |
|                | <i>Hesperia comma</i>               | Liaoning, Wuge Mountain  | KJ775048 | KJ786304 | HM393208 |

|              |                               |                        |          |          |          |
|--------------|-------------------------------|------------------------|----------|----------|----------|
|              | <i>Ochlodes venata</i>        | From GenBank           | JQ924458 | KM895466 | HM391838 |
|              | <i>Notocrypta curvifascia</i> | Fujian, Wuyi Mountain  | KM895444 | KM895465 | KM895482 |
|              | <i>Parnara apostata</i>       | Yunnan, Menglun        | KJ775037 | KJ786293 | KM895483 |
|              | <i>Parnara ganga</i>          | Fujian, Wuyi Mountain  | KJ775035 | KJ786291 | KM895484 |
|              | <i>Pelopidas agna</i>         | Yunnan, Menglun        | KJ775043 | KJ786299 | KF387988 |
|              | <i>Polytremis lubricans</i>   | Hainan, Baisha         | KJ775038 | KJ786295 | KM895486 |
|              | <i>Polytremis theca</i>       | Fujian, Wuyi Mountain  | KJ775040 | KJ786297 | KC684413 |
|              | <i>Polytremis zina</i>        | Zhejiang, Wuyanling    | KJ775039 | KJ786296 | KC684395 |
| Papilionidae | <i>Troides helena</i>         | Shaanxi, Yangling      | KM895448 | KM895470 | KM895487 |
|              | <i>Papilio protenor</i>       | Yunnan, Jinping        | KM669332 | KM669387 | HM246460 |
|              | <i>Sericinus montelus</i>     | Shaanxi, Taibai County | KM669333 | KM669388 | KF723528 |
| Pieridae     | <i>Eurema andersoni</i>       | Shaanxi, Taibai County | KM669291 | KM669343 | HM246460 |
|              | <i>Pontia edusa</i>           | Yunnan, Xishuangbanna  | KM669318 | KM669371 | KC462876 |

---

—, data not available.
